# Supplementary material
Source: bioRxiv or medRxiv preprint supplement (https://www.medrxiv.org/highwire/filestream/87365/field_highwire_adjunct_files/0/2020.06.23.20138578-1.pdf)
Supplement: Supplementary file [file 2020.06.23.20138578-1.pdf]

## Appendix to *Household finished flooring and soil-transmitted helminth and Giardia infections among children in rural Bangladesh and Kenya: a prospective cohort study*

### Appendix 1. Outcome measurement

#### *Stool collection and storage*

Field staff provided primary caregivers of study participants with sterile containers. They returned the following morning to collect stool from the child's most recent defecation event. After stool collection, all study participants received a single dose of albendazole. Stool specimens were transported on ice to the field laboratory in each country, and 1 g of stool was archived in 1 ml of 100% ethanol. Stool as at -20°C until it was moved to a -80°C freezer.

#### *Soil-transmitted helminth detection using Kato-Katz*

On the day of stool collection, trained technicians performed double-slide Kato-Katz on fresh stool within 30 minutes of preparing each sample. Field staff enumerated *Ascaris lumbricoides*, hookworm, and *Trichuris trichiura* ova. For quality assurance, in Bangladesh 10% of slides were evaluated independently by two technicians, and 5% were evaluated by the same experienced parasitologist who conducted Kato-Katz training. In Kenya, 10% of slides were evaluated by an expert parasitologist.

#### *Soil-transmitted helminth detection using Multi-parallel qPCR*

Preserved stool samples from Bangladesh were shipped to Smith College in Northampton, MA, United States approximately 1–2 years after stool collection for qPCR analyses. Before shipment lab technicians evaporated from ethanol all samples in order to comply with shipping regulations. Samples were shipped on dry ice. Upon arrival at Smith College, samples were stored at -20°C until analysis. Preserved stool samples from Kenya were transported to the Eastern and Southern Africa Centre of International Parasite Control laboratory at the Kenya Medical Research Institute in Nairobi, Kenya, for analysis.

Lab technicians extracted DNA using the FastDNA Spin Kit for Soil (MP Biomedicals, Solon, OH) using a previously published modified version of the manufacturer's methodology.<sup>1</sup> Lab technicians used an internal amplification control (IAC) plasmid during the DNA extraction to ensure successful isolation and adequate DNA recovery. The mean and standard deviation of the mean quantitation cycle (Cq) value for IAC results was calculated from all samples. Lab technicians performed experimental qPCR reactions using multi-parallel assays that target non-coding repetitive sequences to detect *A. lumbricoides*<sup>2</sup>, *T. trichiura*, *Necator americanus*, *Ancylostoma duodenale*<sup>3</sup> and *Ancylostoma ceylanicum*<sup>4</sup> (Bangladesh only). Lab technicians tested all samples in replicate reactions. We classified samples as positive if amplification occurred in both reactions with a Cq value of <40 and samples which produced Cq values  $\geq 40$  in both replicate reactions or failed to amplify in both replicate reactions as negative. A random subsample of stool samples from Kenya were shipped to Smith College for quality assurance.

#### *G. duodenalis detection using qPCR (Bangladesh)*

Lab technicians extracted DNA from 200 mg of stool using the QIAamp Fast DNA Stool Mini Kit (QIAGEN, Hilden, Germany). They eluted the DNA in 200  $\mu$ l of ATE buffer (supplied with the QIAGEN kit). The protozoa were measured by multiplex real-time PCR using a previously published protocol.<sup>5</sup> Primers

<sup>1</sup>Mejia R, Vicuna Y, Broncano N, Sandoval C, Vaca M, Chico M, et al. A Novel, Multi-Parallel, Real-Time Polymerase Chain Reaction Approach for Eight Gastrointestinal Parasites Provides Improved Diagnostic Capabilities to Resource-Limited At-Risk Populations. *Am J Trop Med Hyg.* 2013; 88: 1041–1047. <https://doi.org/10.4269/ajtmh.12-0726> PMID: 23509117

<sup>2</sup>Pilotte N, Maasch JRMA, Easton AV, Dahlstrom E, Nutman TB, Williams SA. Targeting a highly repeated germline DNA sequence for improved real-time PCR-based detection of *Ascaris* infection in human stool. *PLoS Negl Trop Dis.* 2019; 13: e0007593. <https://doi.org/10.1371/journal.pntd.0007593> PMID: 31329586

<sup>3</sup>Pilotte N, Papaikovou M, Grant JR, Bierwert LA, Llewellyn S, McCarthy JS, et al. Improved PCR- Based Detection of Soil Transmitted Helminth Infections Using a Next-Generation Sequencing Approach to Assay Design. *PLoS Negl Trop Dis.* 2016; 10: e0004578. <https://doi.org/10.1371/journal.pntd.0004578> PMID: 27027771

<sup>4</sup>Papaikovou M, Pilotte N, Grant JR, Traub RJ, Llewellyn S, McCarthy JS, et al. A novel, species-specific, real-time PCR assay for the detection of the emerging zoonotic parasite *Ancylostoma ceylanicum* in human stool. *PLoS Negl Trop Dis.* 2017; 11: e0005734. <https://doi.org/10.1371/journal.pntd.0005734> PMID: 28692668

<sup>5</sup>Haque R, Roy S, Siddique A, et al. Multiplex real-time PCR assay for detection of *Entamoeba histolytica*, *Giardia intestinalis*, and *Cryptosporidium* spp. *Am J Trop Med Hyg.* 2007; 76(4): 713-717.

and probes were purchased from Integrated DNA Technologies (Singapore). Amplification reactions were performed in a volume of 25  $\mu\text{L}$  with 12.5  $\mu\text{L}$  of QIAGEN Multiplex PCR Master Mix (QIAGEN, Hilden, Germany). Each reaction contained an additional 0.4  $\mu\text{M}$  of each Gd-80F, Gd-127R primers and 0.04  $\mu\text{M}$  of Gd-FT probes and 3  $\mu\text{l}$  of the DNA sample. Samples were initial denatured for 15 minutes at 95°C, denatured at 95°C for 20 seconds for 40 cycles, and annealed at 60°C for 1 minute with fluorescence data collection. Lab technicians performed amplification and analysis on the CFX96 Real-Time System (BioRad, Hercules, CA). Each run included three positive controls and one negative control. We classified a sample as positive if its Ct was <40.

***G. duodenalis detection using ELISA (Kenya)***

Lab technicians at Kenya Medical Research Institute in Nairobi, Kenya, analyzed stool by monoclonal enzyme-linked immunosorbent assay (ELISA) (Giardia II, Alere International, Galway, Ireland) to detect *G. duodenalis* cysts. Samples were measured in duplicate; discrepant samples were rerun.

Appendix Figure 1. Enrollment flow chart

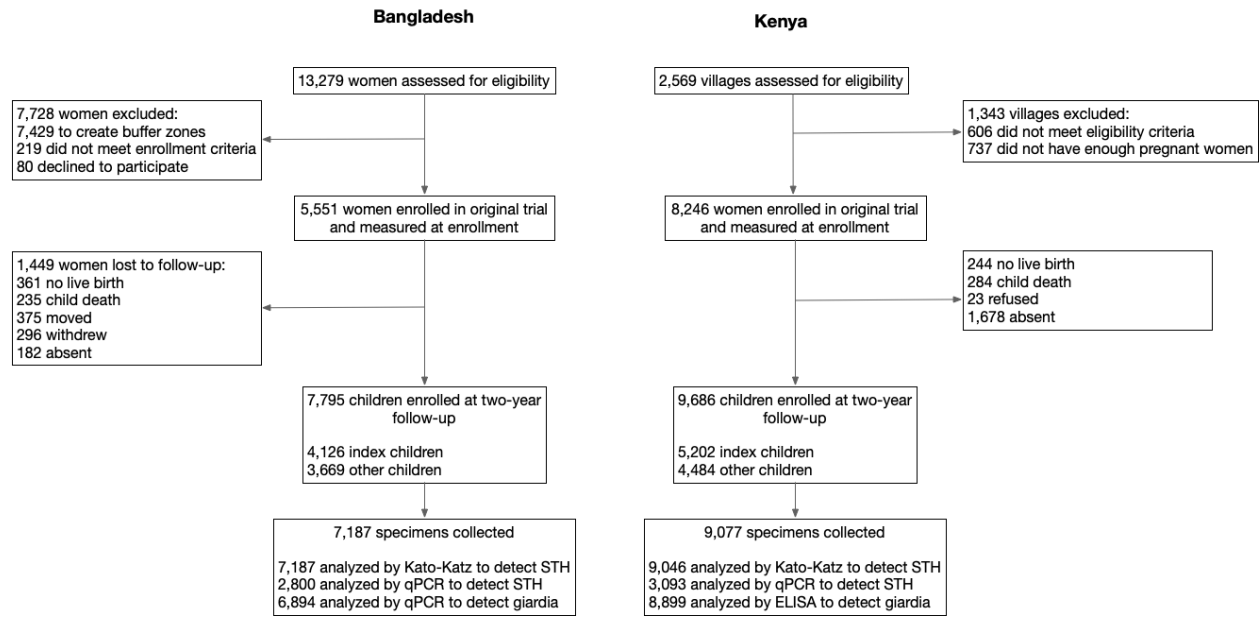

Appendix Figure 2. Eggs per gram among individuals with STH infections detected by Kato-Katz at two-year follow-up by household flooring status at enrollment

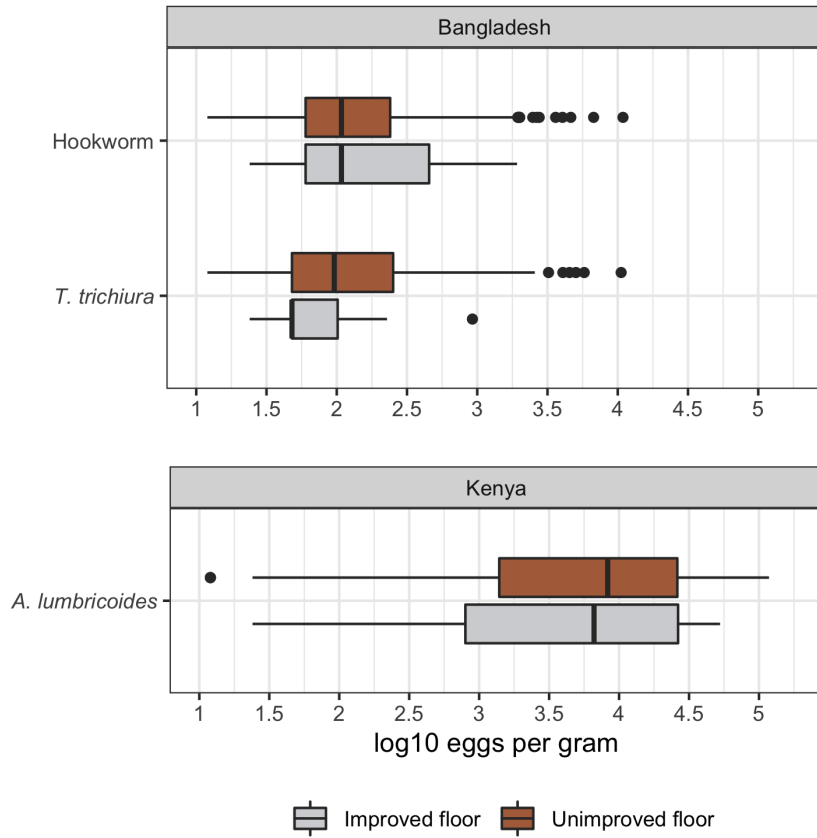

**Appendix Figure 3. Adjusted prevalence ratios for household flooring status at enrollment and soil-transmitted helminth and *Giardia* prevalence at two-year follow-up stratified by potential effect modifiers**

**A) Bangladesh**

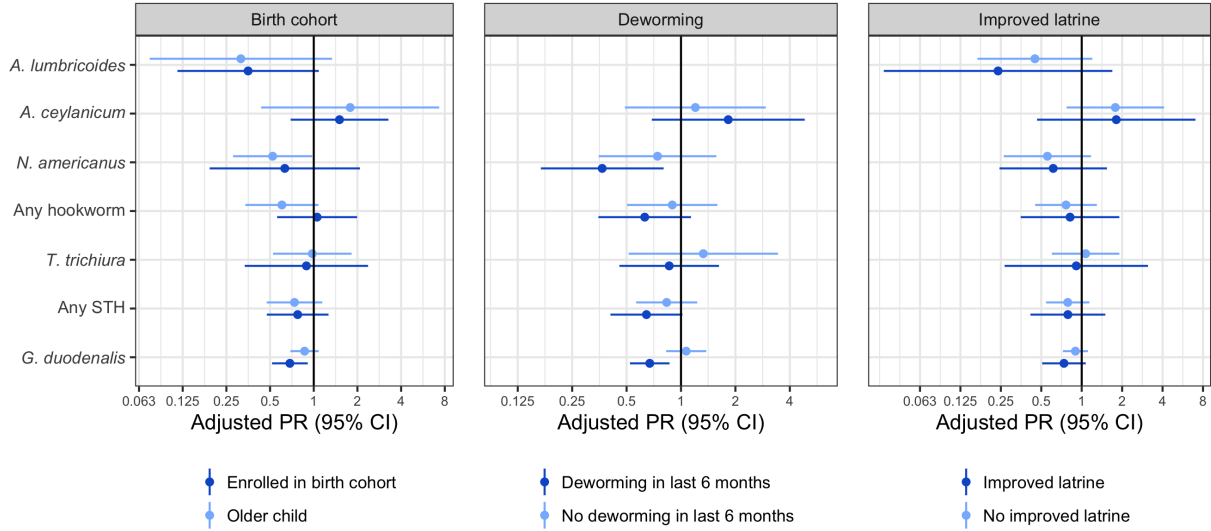

**B) Kenya**

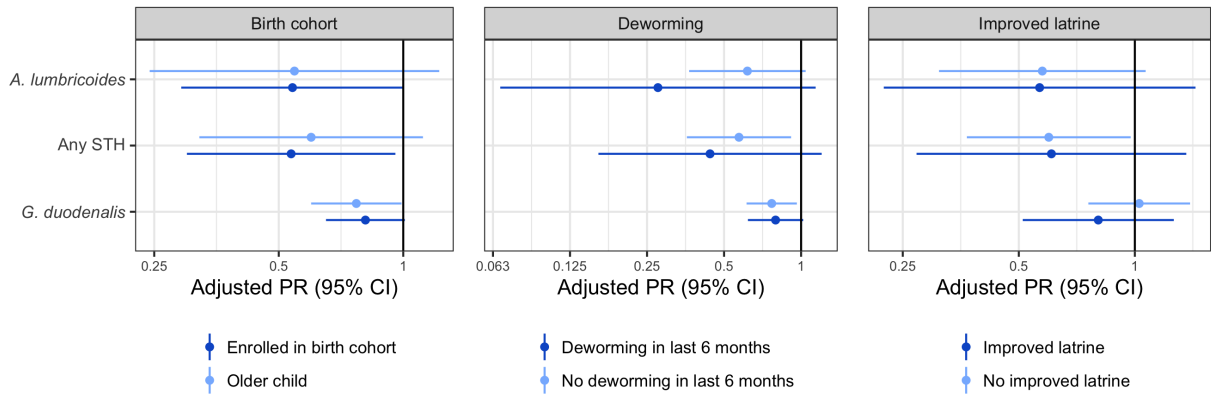

Finished floors includes wood, cement, or tile household floors; unfinished floors were made of soil or earth. In the plots error bars indicate 95% confidence intervals. Prevalence ratios (PRs) compared the prevalence of infection at two-year follow-up in children with improved household flooring at enrolment to those with unimproved household flooring at enrollment. Adjusted PRs control for potential confounders associated with the outcome (see list in the Methods section). Confidence intervals were adjusted for clustering at the village level. Results are not shown for *A. lumbricoides* in Panel A) for deworming because of sparse data. All interaction p-values were  $\geq 0.05$  except for the p-value for *G. duodenalis* in Bangladesh for child age.

Appendix Figure 4. Predicted probability of household finished floor status

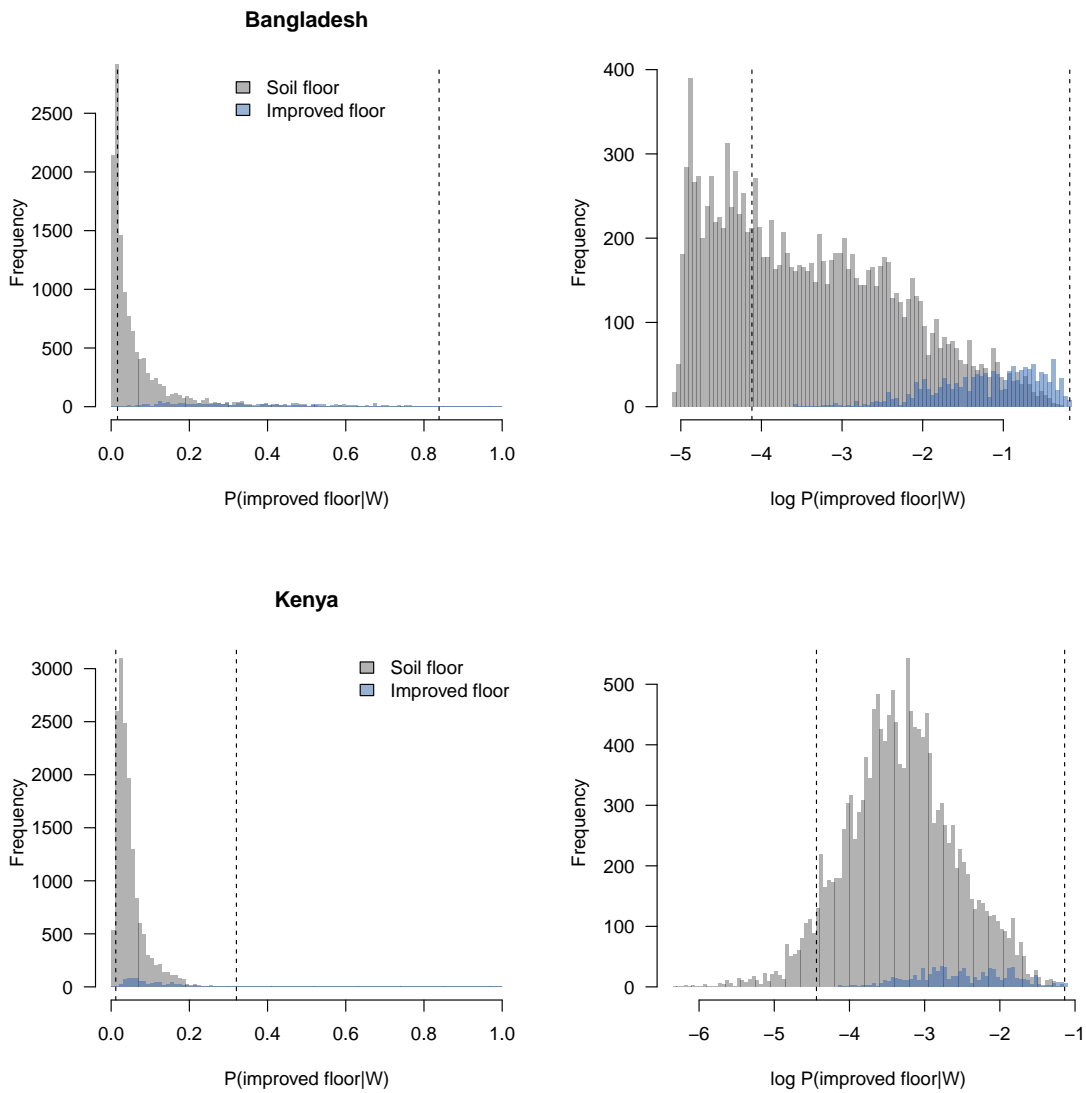

The predicted probability of having a finished floor adjusting for covariates defined above was estimated using an ensemble machine learning algorithm and the following covariates if they were associated with the outcome using a likelihood ratio test ( $p$ -value  $< 0.2$ ): month, child age, child sex, birth order (Bangladesh only), mother's age, mother's education, mother's height, number of household members  $\leq 18$  years, total number of individuals in the compound, food insecurity, household assets, and intervention arm.

Appendix Figure 5. Sensitivity analysis accounting for changes in household flooring status during the follow-up period

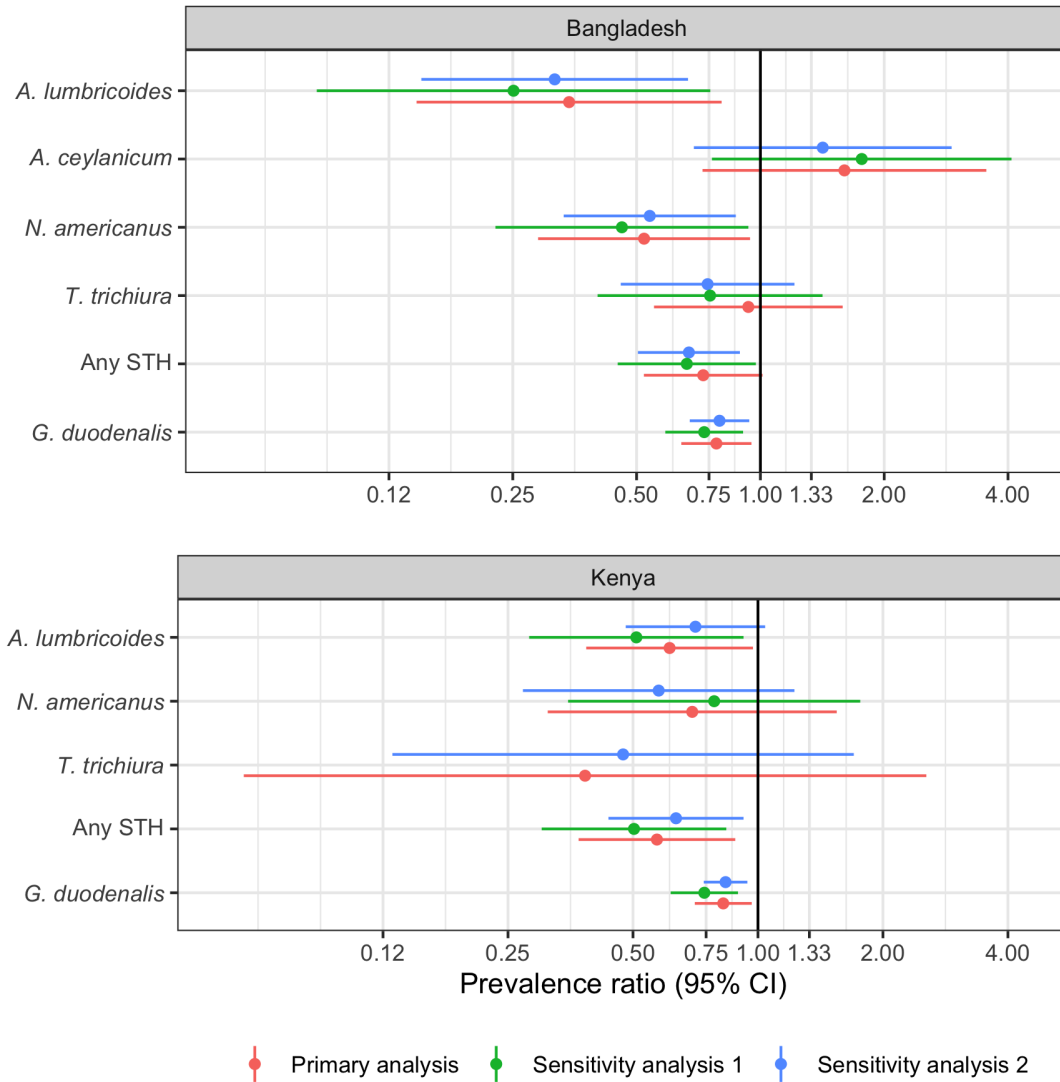

Finished floors includes wood, cement, or tile household floors; unfinished floors were made of soil or earth. In the plots error bars indicate 95% confidence intervals. Prevalence ratios (PRs) compared the prevalence of infection at two-year follow-up in children with improved household flooring at enrolment to those with unimproved household flooring at enrollment. Adjusted PRs control for potential confounders associated with the outcome (see list in the Methods section). Confidence intervals were adjusted for clustering at the village level. Results are not shown for *T. trichiura* in Kenya for Sensitivity Analysis 1 because of sparse data.

Primary analysis: Uses household flooring status at enrollment regardless of changes at two-year follow-up.

Sensitivity analysis 1: Excludes households that changed flooring status between enrollment and two-year follow-up.

Sensitivity analysis 2: Includes households that improved their household flooring status between enrollment and follow-up in the exposure group.

**Appendix Table 1. Soil-transmitted helminth and *Giardia duodenalis* prevalence and mean Cq value detected by qPCR at two-year follow-up by household flooring status at enrollment**

|                        | Finished floors |                        |    |                                                   | Unfinished floors |                       |     |                                                   |
|------------------------|-----------------|------------------------|----|---------------------------------------------------|-------------------|-----------------------|-----|---------------------------------------------------|
|                        | N               | Prevalence<br>(95% CI) | N  | Median Cq<br>value in positive<br>samples (range) | N                 | Prevalence<br>(95%CI) | N   | Median Cq<br>value in positive<br>samples (range) |
| <b>Bangladesh</b>      |                 |                        |    |                                                   |                   |                       |     |                                                   |
| <i>A. lumbricoides</i> | 255             | 2.0 (0.4, 3.7)         | 5  | 24.8 (22.3, 31.2)                                 | 2,544             | 13.8 (12.0, 15.5)     | 350 | 23.3 (16.4, 36.1)                                 |
| <i>A. ceylanicum</i>   | 255             | 4.3 (1.6, 7.4)         | 11 | 24.1 (16.5, 37.8)                                 | 2,544             | 3.7 (2.9, 4.6)        | 95  | 23.5 (14.4, 37.1)                                 |
| <i>N. americanus</i>   | 255             | 5.1 (2.5, 8.2)         | 13 | 20.2 (13.9, 27.2)                                 | 2,544             | 19.7 (17.7, 21.9)     | 502 | 20.8 (14.0, 35.5)                                 |
| <i>T. trichiura</i>    | 255             | 5.5 (2.9, 8.6)         | 14 | 27.7 (25.2, 36.8)                                 | 2,544             | 12.9 (11.0, 14.9)     | 329 | 27.7 (21.4, 40.0)                                 |
| Any STH                | 255             | 14.5 (9.8, 19.7)       | –  | –                                                 | 2,544             | 36.7 (34.1, 39.4)     | –   | –                                                 |
| <i>G. duodenalis</i>   | 661             | 19.4 (16.1, 22.8)      | –  | –                                                 | 6,233             | 33.2 (31.7, 34.6)     | –   | –                                                 |
| <b>Kenya</b>           |                 |                        |    |                                                   |                   |                       |     |                                                   |
| <i>A. lumbricoides</i> | 174             | 11.5 (7.0, 17.5)       | 20 | 26.2 (18.5, 33.7)                                 | 2,924             | 23.7 (21.3, 25.9)     | 692 | 24.8 (16.0, 39.6)                                 |
| <i>N. americanus</i>   | 174             | 3.4 (1.1, 6.5)         | 6  | 28.8 (18.7, 34.8)                                 | 2,923             | 7.2 (5.7, 8.8)        | 209 | 24.5 (11.1, 39.2)                                 |
| <i>T. trichiura</i>    | 174             | 1.1 (0.0, 3.1)         | 2  | 30.0 (27.3, 32.7)                                 | 2,922             | 1.2 (0.6, 2.0)        | 35  | 28.5 (23.1, 34.6)                                 |
| Any STH                | 173             | 14.5 (9.3, 20.4)       | –  | –                                                 | 2,920             | 29.2 (26.6, 31.8)     | –   | –                                                 |
| <i>G. duodenalis</i>   | 456             | 31.4 (27.0, 35.9)      | –  | –                                                 | 8,436             | 39.1 (37.8, 40.4)     | –   | –                                                 |

This table excludes observations with propensity scores in the highest and lowest 1% of the observed distribution of propensity scores in each country. Propensity scores estimated the probability a child lived in a household with a finished floor conditioning on the following covariates if they were associated with the outcome using a likelihood ratio test (p-value <0.2): month, child age, child sex, birth order (Bangladesh only), mother’s age, mother’s education, mother’s height, number of household members ≤ 18 years, total number of individuals in the compound, food insecurity, household assets, and intervention arm. In Kenya, *G. duodenalis* was measured by ELISA, not qPCR. Quantitative estimates of infection intensity were not available for this measure using ELISA.



**Appendix Table 2: Soil-transmitted helminth prevalence and infection intensity detected by Kato-Katz at two-year follow-up by household flooring status at enrollment**

|                        | Finished floors |                        |     |                                                       | Unfinished floors |                        |       |                                                       |
|------------------------|-----------------|------------------------|-----|-------------------------------------------------------|-------------------|------------------------|-------|-------------------------------------------------------|
|                        | N               | Prevalence<br>(95% CI) | N   | Geometric Mean<br>EPG in positive<br>samples (95% CI) | N                 | Prevalence<br>(95% CI) | N     | Geometric Mean<br>EPG in positive<br>samples (95% CI) |
| <b>Bangladesh</b>      |                 |                        |     |                                                       |                   |                        |       |                                                       |
| Hookworm               | 691             | 2.2 (1.2, 3.3)         | 691 | 0.12 (0.06, 0.18)                                     | 6,496             | 8.3 (7.4, 9.1)         | 6,496 | 0.49 (0.43, 0.56)                                     |
| <i>T. trichiura</i>    | 691             | 2.3 (1.3, 3.6)         | 691 | 0.10 (0.05, 0.16)                                     | 6,496             | 7.5 (6.6, 8.4)         | 6,496 | 0.43 (0.36, 0.51)                                     |
| <b>Kenya</b>           |                 |                        |     |                                                       |                   |                        |       |                                                       |
| <i>A. lumbricoides</i> | 471             | 11.7 (8.5, 14.9)       | 471 | 1.62 (0.85, 2.70)                                     | 8,568             | 20.4 (19.1, 21.7)      | 8,568 | 4.77 (3.67, 6.12)                                     |
| Any STH                | 471             | 12.1 (8.9, 15.3)       | –   | –                                                     | 8,568             | 22.3 (20.9, 23.6)      | –     | –                                                     |

In Bangladesh, results for *A. lumbricoides* are not shown due to concerns about potential misclassification. In Kenya, overall prevalence of any STH in each country including hookworm and *T. trichiura*.

**Appendix Table 3: Unadjusted and adjusted prevalence ratios for soil-transmitted helminth infection detected by Kato-Katz**

|                        | N     | Unadjusted PR<br>(95% CI) | Adjusted PR<br>(95% CI) |
|------------------------|-------|---------------------------|-------------------------|
| <b>Bangladesh</b>      |       |                           |                         |
| Hookworm               | 7,187 | 0.26 (0.16, 0.43)         | 0.65 (0.39, 1.08)       |
| <i>T. trichiura</i>    | 7,187 | 0.31 (0.19, 0.51)         | 0.57 (0.33, 0.96)       |
| <b>Kenya</b>           |       |                           |                         |
| <i>A. lumbricoides</i> | 9,039 | 0.57 (0.43, 0.76)         | 0.69 (0.51, 0.93)       |
| Any STH                | 9,039 | 0.54 (0.42, 0.71)         | 0.66 (0.50, 0.88)       |

Prevalence ratios (PRs) compared the prevalence of infection at two-year follow-up in children with improved household flooring at enrolment to those with unimproved household flooring at enrollment. Adjusted PRs control for potential confounders associated with the outcome (see list in the Methods section). Confidence intervals were adjusted for clustering at the village level. In Bangladesh, results for *A. lumbricoides* are not shown due to concerns about potential misclassification.

**Appendix Table 4: Unadjusted and adjusted soil-transmitted helminth fecal egg count reduction detected by Kato-Katz among infected individuals at two-year follow-up by household flooring status at enrollment**

|                        | N     | Unadjusted FECR<br>(95% CI) | Adjusted FECR<br>(95% CI) |
|------------------------|-------|-----------------------------|---------------------------|
| <b>Bangladesh</b>      |       |                             |                           |
| Hookworm               | 554   | 0.37 (-0.63, 1.38)          | 0.49 (-2.40, 3.38)        |
| <i>T. trichiura</i>    | 502   | -0.60 (-0.93, -0.28)        | -0.45 (-0.59, -0.32)      |
| <b>Kenya</b>           |       |                             |                           |
| <i>A. lumbricoides</i> | 1,802 | -0.05 (-0.39, 0.29)         | 0.06 (-0.05, 0.17)        |

Fecal egg count reductions (FECRs) are defined as the ratio of mean eggs per gram among positive samples detected by Kato-Katz minus one. Adjusted PRs control for potential confounders associated with the outcome (see list in the Methods section). Confidence intervals were adjusted for clustering at the village level. In Bangladesh, results for *A. lumbricoides* are not shown due to concerns about potential misclassification.

**Appendix Table 5: Unadjusted and adjusted prevalence ratios for infection detected by qPCR or ELISA estimated using targeted maximum likelihood estimation**

|                        | N     | Unadjusted PR<br>(95% CI) | Adjusted PR<br>(95% CI) |
|------------------------|-------|---------------------------|-------------------------|
| <b>Bangladesh</b>      |       |                           |                         |
| <i>A. lumbricoides</i> | 2,796 | 0.14 (0.07, 0.28)         | 0.17 (0.10, 0.30)       |
| <i>A. ceylanicum</i>   | 2,796 | 1.17 (0.53, 2.58)         | 1.97 (0.85, 4.57)       |
| <i>N. americanus</i>   | 2,785 | 0.26 (0.16, 0.43)         | 0.53 (0.40, 0.71)       |
| <i>T. trichiura</i>    | 2,796 | 0.45 (0.28, 0.71)         | 1.11 (0.87, 1.43)       |
| Any STH                | 2,796 | 0.40 (0.29, 0.55)         | 0.71 (0.58, 0.86)       |
| <i>G. duodenalis</i>   | 6,874 | 0.58 (0.47, 0.71)         | 0.82 (0.70, 0.95)       |
| <b>Kenya</b>           |       |                           |                         |
| <i>A. lumbricoides</i> | 3,059 | 0.51 (0.27, 0.97)         | 0.55 (0.30, 1.03)       |
| <i>N. americanus</i>   | 2,961 | 0.53 (0.18, 1.55)         | 0.51 (0.15, 1.75)       |
| <i>T. trichiura</i>    | 2,983 | 0.57 (0.03, 11.61)        | 0.55 (0.03, 10.28)      |
| Any STH                | 2,836 | 0.47 (0.26, 0.84)         | 0.52 (0.31, 0.89)       |
| <i>G. duodenalis</i>   | 8,457 | 0.77 (0.65, 0.92)         | 0.80 (0.66, 0.96)       |

Prevalence ratios (PRs) compared the prevalence of infection at two-year follow-up in children with improved household flooring at enrolment to those with unimproved household flooring at enrollment. Adjusted PRs control for potential confounders associated with the outcome (see list in the Methods section). Confidence intervals were adjusted for clustering at the village level.

**Appendix Table 6: Unadjusted and adjusted Cq ratios among infected individuals at two-year follow-up by household flooring status at enrollment estimated using TMLE**

|                        | N     | Unadjusted Cq<br>Ratio (95% CI) | Adjusted Cq<br>Ratio (95% CI) |
|------------------------|-------|---------------------------------|-------------------------------|
| <b>Bangladesh</b>      |       |                                 |                               |
| <i>A. lumbricoides</i> | 355   | 0.07 (-0.05, 0.18)              | 0.10 (0.06, 0.14)             |
| <i>A. ceylanicum</i>   | 106   | -0.00 (-0.19, 0.18)             | 0.06 (-0.12, 0.24)            |
| <i>N. americanus</i>   | 515   | -0.04 (-0.12, 0.04)             | -0.04 (-0.11, 0.04)           |
| <i>T. trichiura</i>    | 341   | 0.00 (-0.12, 0.12)              | 0.01 (-0.09, 0.10)            |
| <i>G. duodenalis</i>   | 2,195 | 0.01 (-0.02, 0.04)              | -0.00 (-0.03, 0.02)           |
| <b>Kenya</b>           |       |                                 |                               |
| <i>A. lumbricoides</i> | 712   | -0.01 (-0.13, 0.10)             | -0.01 (-0.11, 0.10)           |
| <i>N. americanus</i>   | 206   | 0.11 (-0.20, 0.41)              | 0.16 (-0.09, 0.41)            |
| <i>T. trichiura</i>    | 34    | 0.01 (-0.15, 0.18)              | 0.04 (-0.09, 0.17)            |

Cq ratios compared the arithmetic mean Cq value at two-year follow-up in children with improved household flooring at enrolment to those with unimproved household flooring at enrollment. Adjusted Cq ratios control for potential confounders associated with the outcome (see list in the Methods section). Confidence intervals were adjusted for clustering at the village level

**Appendix Table 7. Characteristics at enrollment by household finished flooring status excluding observations with extreme propensity score values**

|                                                | Bangladesh      |          |                   |          | Kenya           |          |                   |          |
|------------------------------------------------|-----------------|----------|-------------------|----------|-----------------|----------|-------------------|----------|
|                                                | Finished floors |          | Unfinished floors |          | Finished floors |          | Unfinished floors |          |
|                                                | N               | Mean / % | N                 | Mean / % | N               | Mean / % | N                 | Mean / % |
| <b>Maternal characteristics</b>                |                 |          |                   |          |                 |          |                   |          |
| Mother's age, years                            | 668             | 24.2     | 2122              | 23.7     | 464             | 28.6     | 8070              | 27.0     |
| Mother's height, cm                            | 666             | 151.9    | 2125              | 151.5    | 432             | 161.8    | 7779              | 160.3    |
| At least some primary education                | 670             | 13.3     | 2146              | 15.7     | 468             | 51.3     | 8138              | 77.7     |
| At least some secondary education              | 670             | 82.8     | 2146              | 80.2     | 468             | 48.7     | 8138              | 22.3     |
| <b>Compound characteristics</b>                |                 |          |                   |          |                 |          |                   |          |
| # individuals living in compound $\leq 18$ yrs | 670             | 1.7      | 2146              | 1.7      | 468             | 3.5      | 8136              | 3.1      |
| Total individuals living in compound           | 670             | 9.9      | 2146              | 10.7     | 468             | 7.4      | 8138              | 8.0      |
| <b>Household characteristics</b>               |                 |          |                   |          |                 |          |                   |          |
| Food secure                                    | 670             | 91.5     | 2146              | 89.2     | 468             | 96.4     | 8138              | 91.3     |
| Has electricity                                | 670             | 89.4     | 2146              | 83.7     | 468             | 28.8     | 8138              | 6.7      |
| Has improved wall materials                    | 670             | 91.9     | 2146              | 66.5     | 468             | 70.3     | 8138              | 0.8      |
| Has improved roof material                     | 670             | 100.0    | 2146              | 99.9     | 468             | 97.6     | 8138              | 66.5     |
| Owens $\geq 1$ tv                              | 670             | 70.7     | 2146              | 56.4     | 468             | 41.0     | 8138              | 11.2     |
| Owens $\geq 1$ bicycle                         | 670             | 35.4     | 2146              | 41.7     | 468             | 64.3     | 8138              | 54.5     |
| Owens $\geq 1$ motorcycle                      | 670             | 23.0     | 2146              | 11.2     | 468             | 24.6     | 8138              | 8.6      |
| Owens $\geq 1$ mobile phone                    | 670             | 98.5     | 2146              | 95.2     | 468             | 94.7     | 8138              | 81.2     |
| <b>Child characteristics</b>                   |                 |          |                   |          |                 |          |                   |          |
| Child age, years                               | 670             | 4.7      | 2146              | 4.7      | 446             | 3.7      | 7846              | 3.6      |
| Male, %                                        | 670             | 49.3     | 2146              | 49.1     | 468             | 50.9     | 8138              | 47.4     |

This table excludes observations with propensity scores in the highest and lowest 1% of the observed distribution of propensity scores in each country. Propensity scores estimated the probability a child lived in a household with a finished floor conditioning on the following covariates if they were associated with the outcome using a likelihood ratio test (p-value  $< 0.2$ ): month, child age, child sex, birth order (Bangladesh only), mother's age, mother's education, mother's height, number of household members  $\leq 18$  years, total number of individuals in the compound, food insecurity, household assets, and intervention arm.

**Appendix Table 8: Sensitivity analysis excluding observations with extreme predicted probabilities of having finished flooring**

|                        | Primary analysis |                           |                         | Sensitivity analysis |                           |                         |
|------------------------|------------------|---------------------------|-------------------------|----------------------|---------------------------|-------------------------|
|                        | N                | Unadjusted PR<br>(95% CI) | Adjusted PR<br>(95% CI) | N                    | Unadjusted PR<br>(95% CI) | Adjusted PR<br>(95% CI) |
| <b>Bangladesh</b>      |                  |                           |                         |                      |                           |                         |
| <i>A. lumbricoides</i> | 2,799            | 0.14 (0.06, 0.34)         | 0.34 (0.15, 0.80)       | 1,960                | 0.19 (0.08, 0.46)         | 0.35 (0.15, 0.83)       |
| <i>A. ceylanicum</i>   | 2,799            | 1.16 (0.55, 2.42)         | 1.60 (0.72, 3.54)       | 1,960                | 1.26 (0.58, 2.75)         | 1.39 (0.63, 3.08)       |
| <i>N. americanus</i>   | 2,799            | 0.26 (0.14, 0.46)         | 0.52 (0.29, 0.94)       | 1,960                | 0.31 (0.17, 0.56)         | 0.55 (0.30, 1.00)       |
| <i>T. trichiura</i>    | 2,799            | 0.42 (0.25, 0.72)         | 0.93 (0.55, 1.59)       | 1,960                | 0.52 (0.31, 0.88)         | 0.93 (0.54, 1.61)       |
| Any STH                | 2,799            | 0.40 (0.28, 0.56)         | 0.73 (0.52, 1.01)       | 1,960                | 0.48 (0.34, 0.68)         | 0.78 (0.55, 1.09)       |
| <i>G. duodenalis</i>   | 6,894            | 0.58 (0.49, 0.70)         | 0.78 (0.64, 0.95)       | 4,811                | 0.65 (0.54, 0.78)         | 0.80 (0.66, 0.98)       |
| <b>Kenya</b>           |                  |                           |                         |                      |                           |                         |
| <i>A. lumbricoides</i> | 3,098            | 0.49 (0.31, 0.76)         | 0.61 (0.39, 0.97)       | 2,936                | 0.50 (0.31, 0.78)         | 0.61 (0.38, 0.97)       |
| <i>N. americanus</i>   | 3,097            | 0.48 (0.21, 1.08)         | 0.69 (0.31, 1.55)       | 2,935                | 0.48 (0.21, 1.08)         | 0.70 (0.32, 1.56)       |
| <i>T. trichiura</i>    | 3,096            | 0.96 (0.24, 3.88)         | 0.38 (0.06, 2.54)       | 2,934                | 0.91 (0.22, 3.66)         | 0.47 (0.07, 3.22)       |
| Any STH                | 3,093            | 0.49 (0.34, 0.73)         | 0.57 (0.37, 0.88)       | 2,931                | 0.50 (0.34, 0.74)         | 0.58 (0.39, 0.87)       |
| <i>G. duodenalis</i>   | 8,892            | 0.80 (0.70, 0.92)         | 0.82 (0.70, 0.97)       | 8,433                | 0.81 (0.71, 0.94)         | 0.84 (0.73, 0.97)       |

Prevalence ratios (PRs) compared the prevalence of infection at two-year follow-up in children with improved household flooring at enrolment to those with unimproved household flooring at enrollment. Adjusted PRs control for potential confounders associated with the outcome (see list in the Methods section). Confidence intervals were adjusted for clustering at the village level. Analyses excluded observations with propensity scores in the highest and lowest 1% of the observed distribution of propensity scores in each country. Propensity scores estimated the probability a child lived in a household with a finished floor conditioning on the following covariates if they were associated with the outcome using a likelihood ratio test (p-value <0.2): month, child age, child sex, birth order (Bangladesh only), mother's age, mother's education, mother's height, number of household members  $\leq$  18 years, total number of individuals in the compound, food insecurity, household assets, and intervention arm.

Appendix Table 9. E-values for unadjusted and adjusted prevalence ratios

| Outcome                | Diagnostic | E-value | E-value CI |
|------------------------|------------|---------|------------|
| <b>Bangladesh</b>      |            |         |            |
| Hookworm               | Kato-Katz  | 2.43    | 1.00       |
| <i>T. trichiura</i>    | Kato-Katz  | 2.93    | 1.25       |
| <i>A. ceylanicum</i>   | qPCR       | 2.58    | 1.00       |
| <i>A. lumbricoides</i> | qPCR       | 5.28    | 1.79       |
| <i>N. americanus</i>   | qPCR       | 3.24    | 1.31       |
| <i>T. trichiura</i>    | qPCR       | 1.34    | 1.00       |
| Any STH                | qPCR       | 2.10    | 1.00       |
| <i>G. duodenalis</i>   | qPCR       | 1.88    | 1.28       |
| <b>Kenya</b>           |            |         |            |
| <i>A. lumbricoides</i> | Kato-Katz  | 2.27    | 1.35       |
| Any STH                | Kato-Katz  | 2.40    | 1.53       |
| <i>A. lumbricoides</i> | qPCR       | 2.65    | 1.20       |
| <i>N. americanus</i>   | qPCR       | 2.24    | 1.00       |
| <i>T. trichiura</i>    | qPCR       | 4.66    | 1.00       |
| Any STH                | qPCR       | 2.90    | 1.52       |
| <i>G. duodenalis</i>   | qPCR       | 1.72    | 1.23       |

E-values quantify the minimum prevalence ratio that an unmeasured confounder would be required to have both household flooring status and each outcome in order for the unmeasured confounder to be completely responsible for a given prevalence ratio. The E-value confidence interval (CI) was calculated for the 95% confidence interval bound closest to the null. E-value CIs were set equal to 1.00 for PR < 1 with upper bounds  $\geq 1$  and for PR > 1 with upper bounds  $\leq 1$  (Vanderweele et al., 2017). Large E-values indicate that an unmeasured confounder would have to have strong associations with both household flooring and an outcome in order to explain away our findings; thus, small E-values are indicate that unmeasured confounding may be a larger concern for a given estimate.
